# Supplementary material for: Electronic substituent effects on hydrogen-bonding motifs modulate supramolecular polymerisation
Source: Royal Society of Chemistry journal article supplement (doi:10.1039/c2ra22715k), 2012-12-21
Supplement: c2ra22715k.pdf [file c2ra22715k.pdf]

# Electronic Substituent Effects on Hydrogen-Bonding Motifs Modulate Supramolecular Polymerisation

## Supporting Information

Maria L Pellizzaro,<sup>a</sup> Julie Fisher,<sup>a</sup> and Andrew J. Wilson<sup>\*, a, b</sup>

<sup>a</sup>*School of Chemistry, University of Leeds, Woodhouse Lane, Leeds LS2 9JT United Kingdom, Fax: +44 (0)113 3436565; Tel: +44 (0)113 3431409; E-mail: [A.J.Wilson@leeds.ac.uk](mailto:A.J.Wilson@leeds.ac.uk)*

<sup>b</sup>*Astbury Centre for Structural Molecular Biology, University of Leeds, Woodhouse Lane, Leeds LS2 9JT, United Kingdom*

| <b>Section</b>                   | <b>Page</b> |
|----------------------------------|-------------|
| NMR Spectra of Compounds 3 and 4 | 2           |

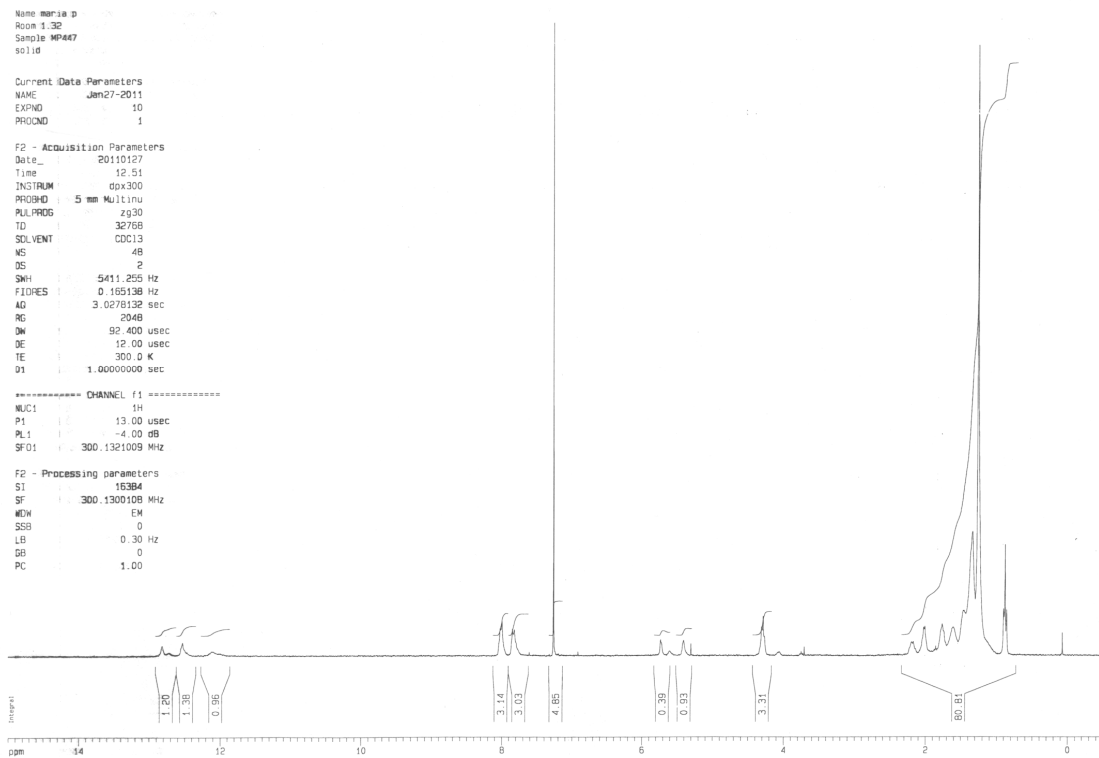

Figure ESI1. <sup>1</sup>H NMR spectrum (30 mM, 300 MHz, CDCl<sub>3</sub>) of compound 3

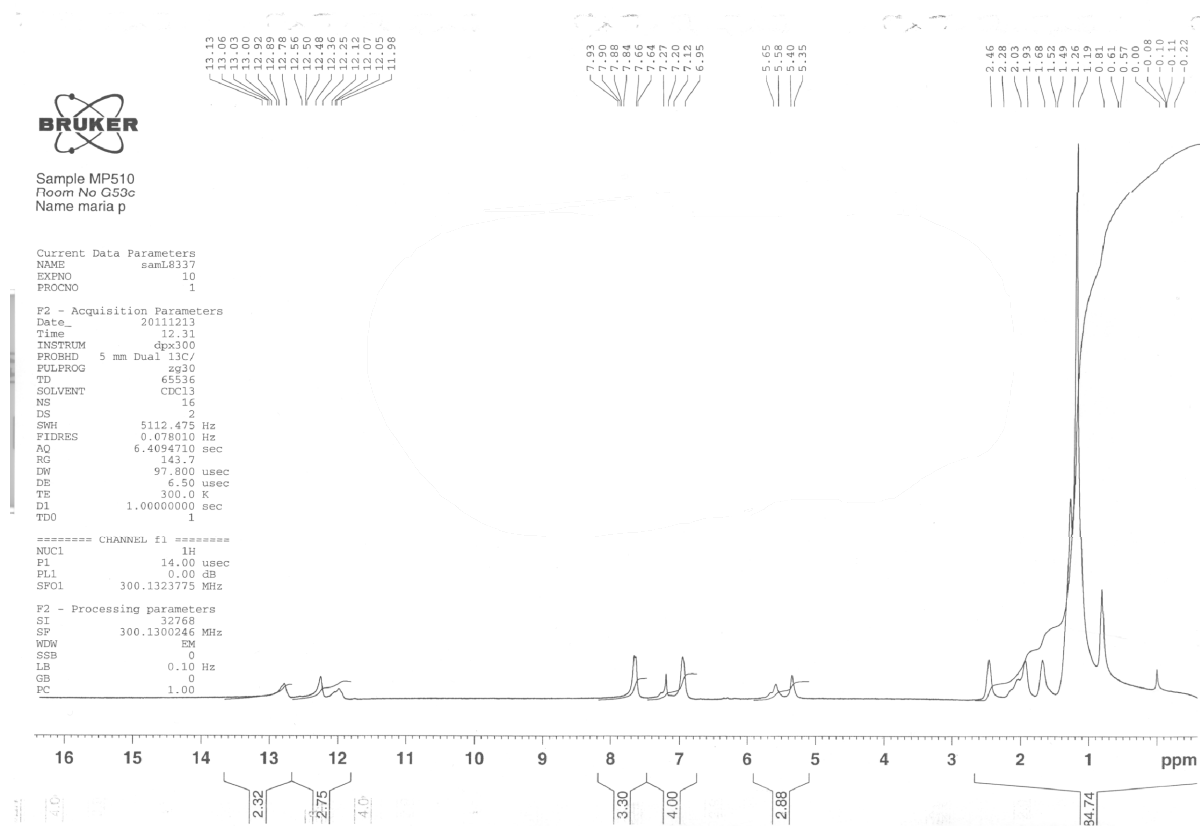

Figure ESI2. <sup>1</sup>H NMR spectrum (30 mM, 300 MHz, CDCl<sub>3</sub>) of compound 4

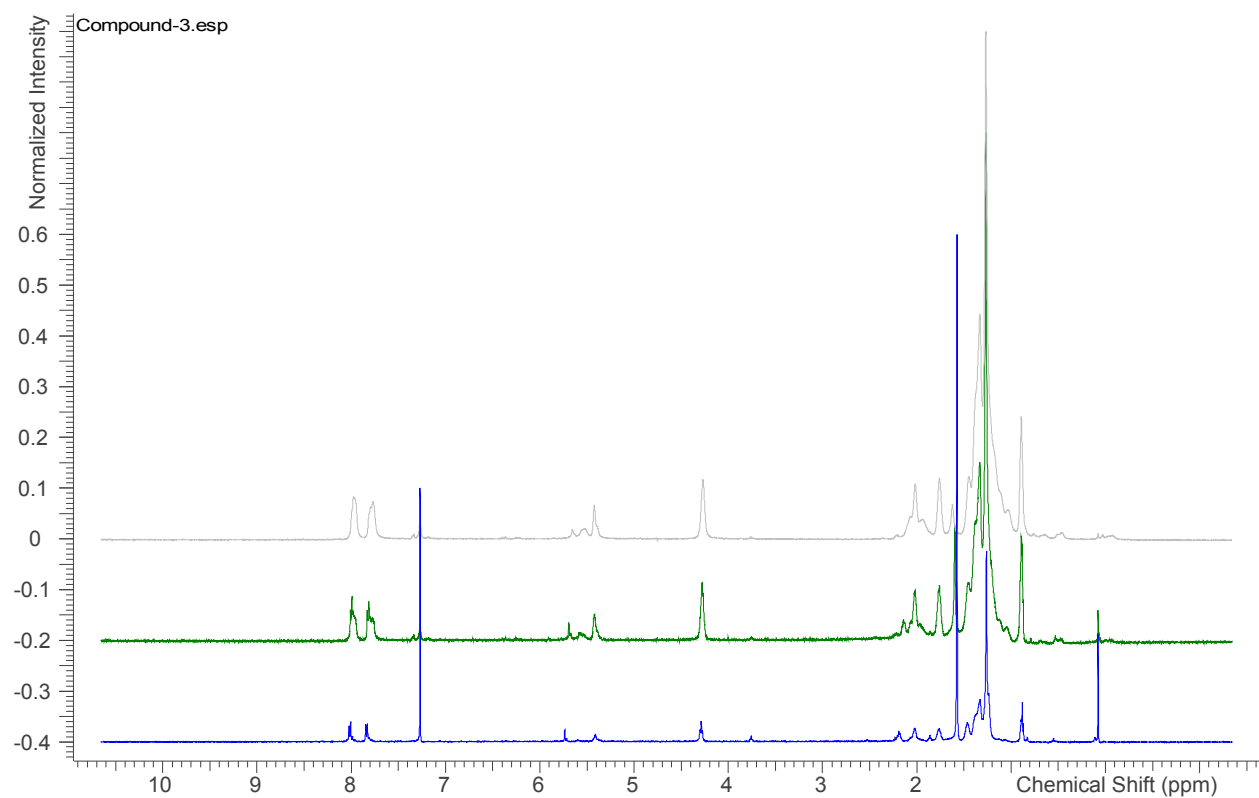

**Figure ESI3.** <sup>1</sup>H NMR spectrum (500 MHz, CDCl<sub>3</sub>) of compound 3 (Blue – 1 mM, green – 10mM, grey – 20mM).

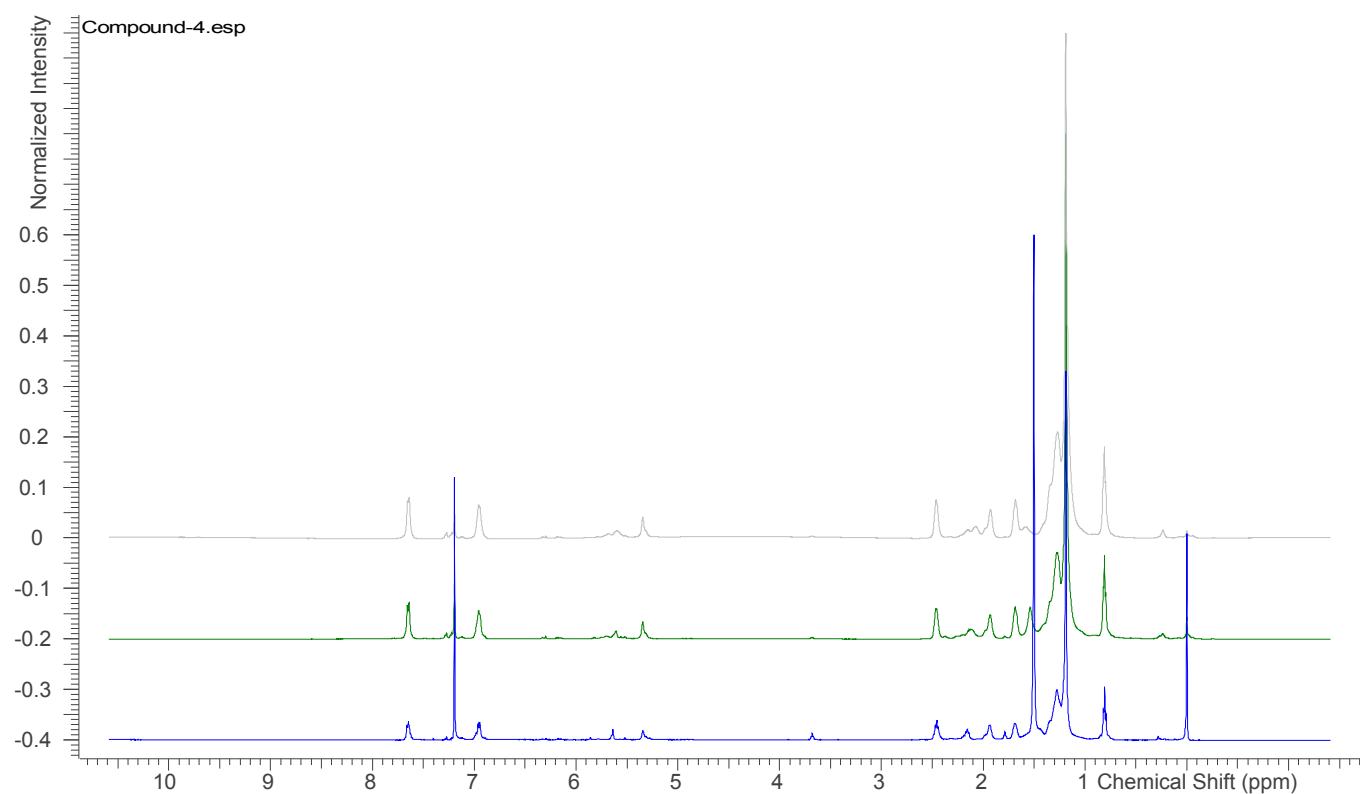

**Figure ESI4.** <sup>1</sup>H NMR spectrum (500 MHz, CDCl<sub>3</sub>) of compound 4 (Blue – 1 mM, green – 10mM, grey – 20mM).
